# Supplementary material for: MiR-3180 inhibits hepatocellular carcinoma growth and metastasis by targeting lipid synthesis and uptake
Source: Cancer Cell Int. 2023 Apr 11;23:66. doi: 10.1186/s12935-023-02915-9 (PMC10091558; doi:10.1186/s12935-023-02915-9)
Supplement: Supplementary file 1 — Additional file 1. Supplementary Figures. Figure S1. MiR-3180 suppresses lipid content in CD36- and SCD1-dependent manner. Figure S2. MiR-3180 inhibits the proliferation, migration, and invasion of HCC cells in CD36- and SCD1-dependent manner. Figure S3. MiR-3180 inhibits the proliferation, migration, and invasion of HCC cells by suppressing lipid synthesis and uptake. Figure S4. The miR-3180 inhibits lipid synthesis in vivo. [file 12935_2023_2915_MOESM1_ESM.pdf]

**Figure S1****A**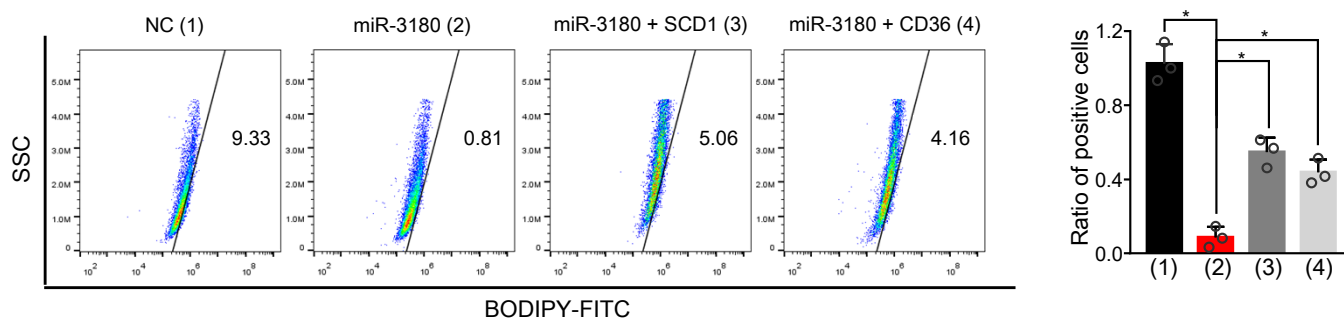**B**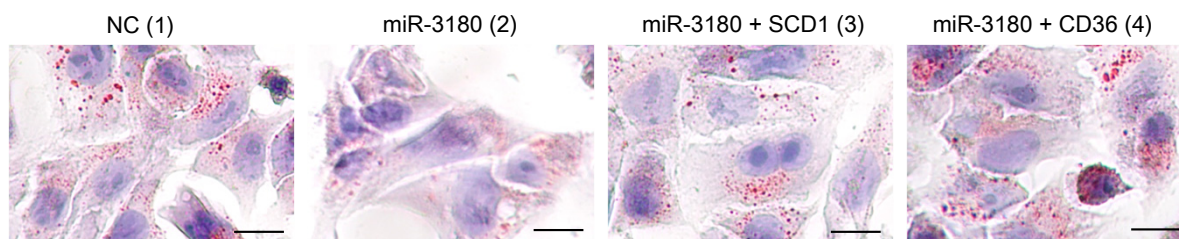**C**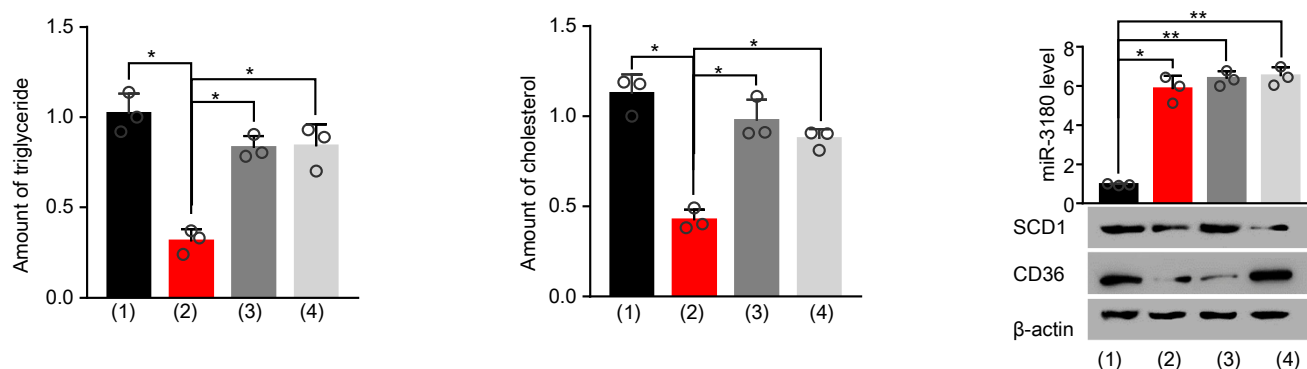**D**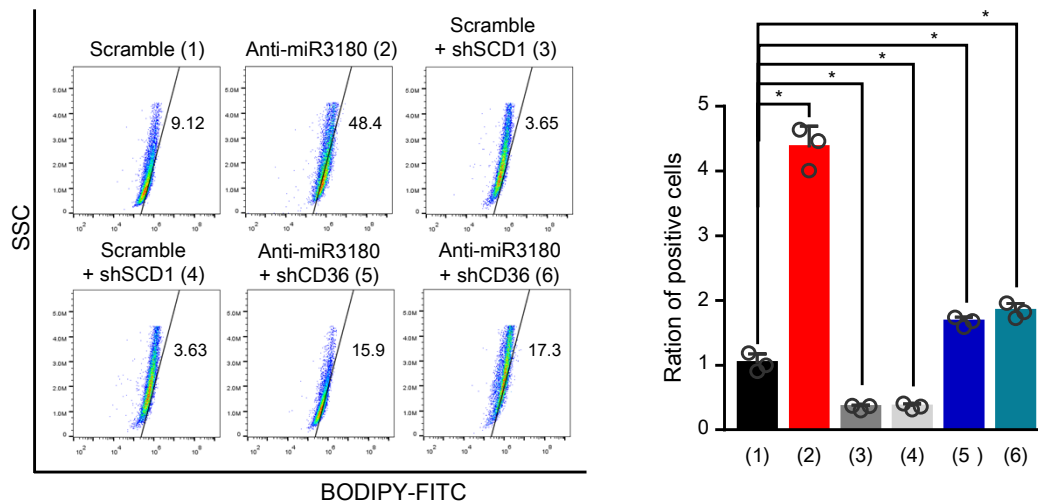**F**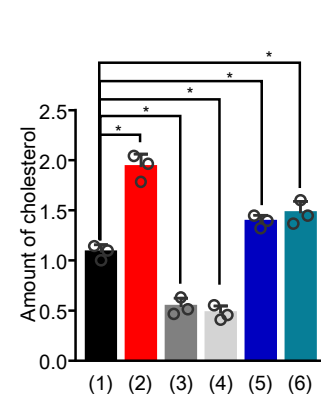**E**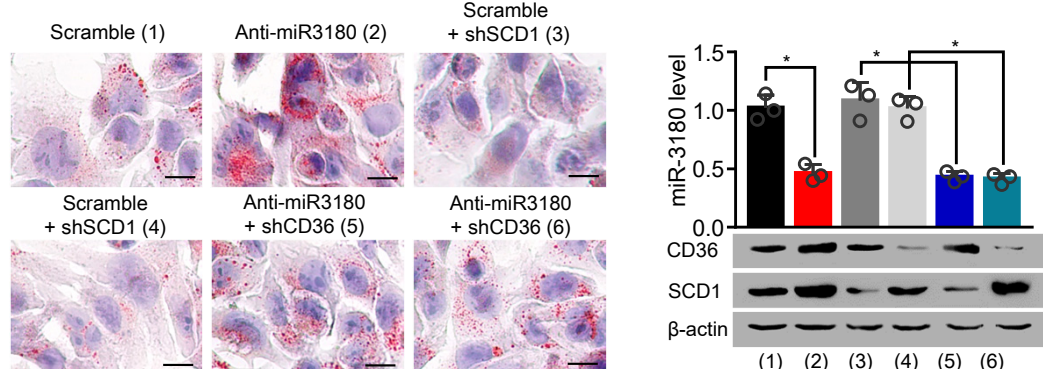

**Figure S1. MiR-3180 suppresses lipid content in CD36- and SCD1-dependent manner.** (A) Flow cytometry analysis of lipid content in MHCC-97H cells transfected with miR-3180 and the indicated expression vectors or negative control. The relative of lipid content are shown in the right panel. (B) Oil red O staining of lipid content in MHCC-97H cells transfected as (A). Scale bar: 20  $\mu$ m. (C) The relative triglyceride, cholesterol and the expression of miR-3180, SCD1 and CD36 levels in MHCC-97H cells transfected as (A). (D) Flow cytometry analysis of lipid content in MHCC-97H cells transfected with the indicated vectors. The relative lipid content is shown in the right nearby panel. (E) Oil red O staining of lipid content, RT-qPCR and immunoblotting analysis of miR-3180, CD36 and SCD1 expression in MHCC-97H cells transfected as (D). Scale bar: 20  $\mu$ m. (F) Relative triglyceride and cholesterol level in MHCC-97H cells transfected as (D). Data shown are presented as mean  $\pm$  SD of triplicate measurements with similar results. \*\*P < 0.01.

**Figure S2**

**A**

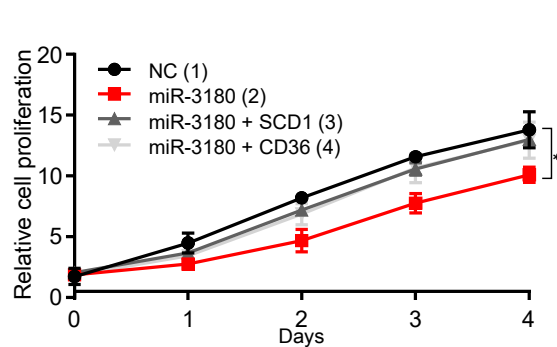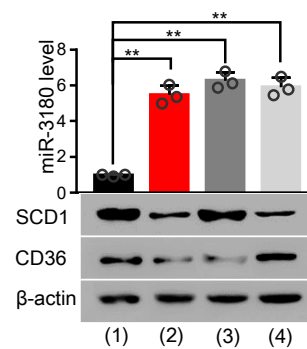

**B**

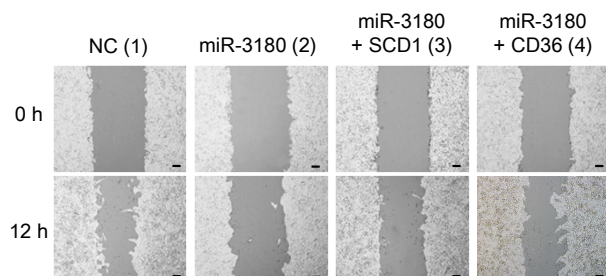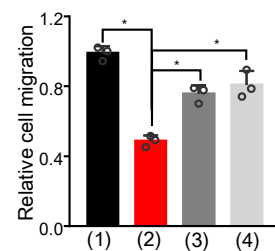

**C**

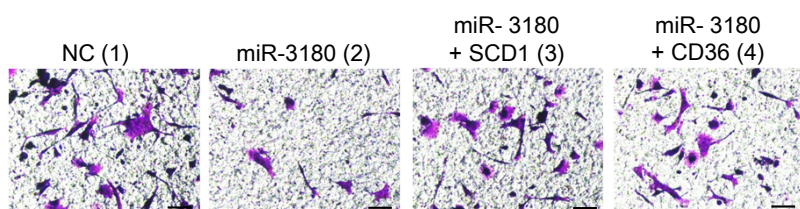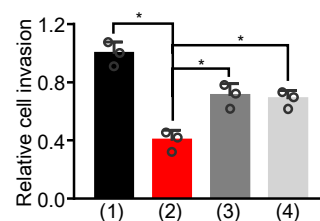

**D**

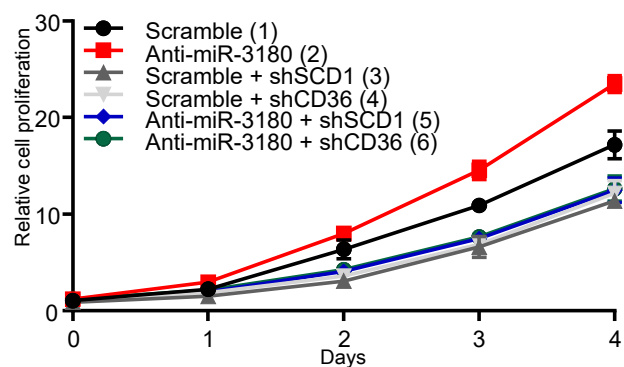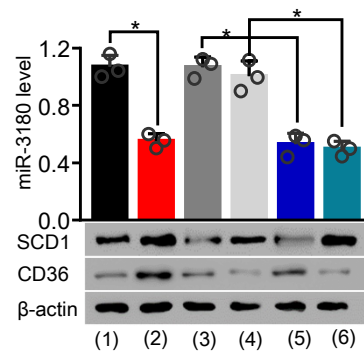

**E**

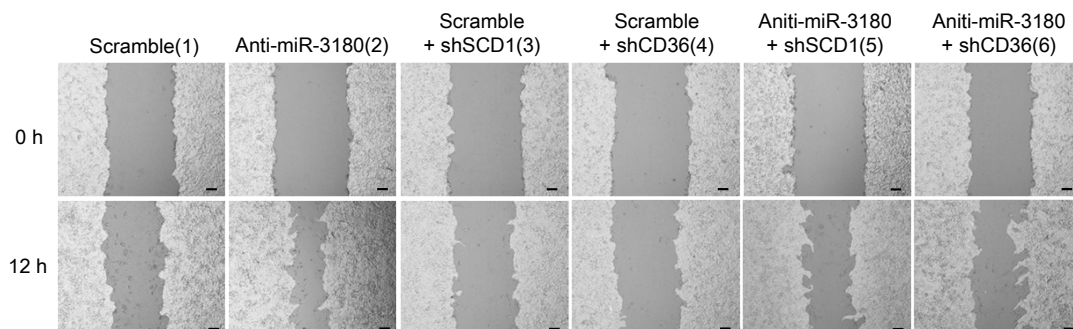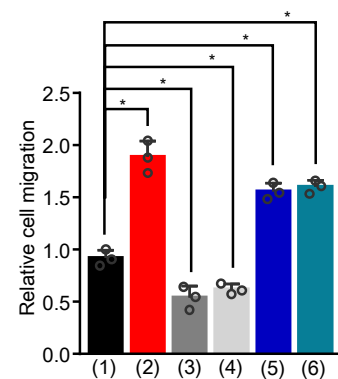

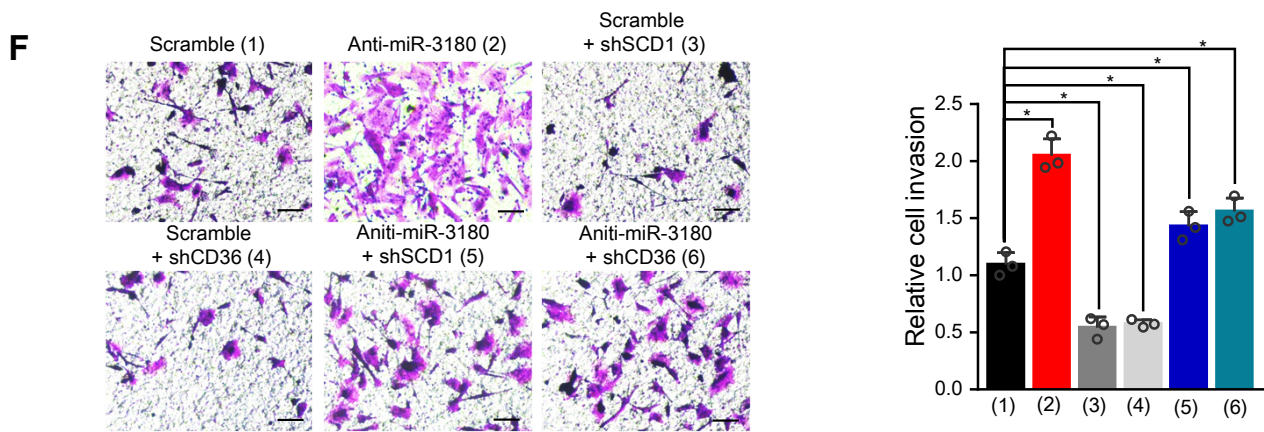

**Figure S2. MiR-3180 inhibits the proliferation, migration, and invasion of HCC cells in CD36- and SCD1-dependent manner.** (A) Cell proliferation analysis of MHCC-97H cells transfected with indicated expression vectors. The expression of miR-3180, CD36 and SCD1 are demonstrated in the right panel. (B) Wound healing analysis of MHCC-97H cells transfected as (A). Scale bar: 50  $\mu$ m. Statistical analysis of relative migrations are demonstrated shown in the right panel. (C) Transwell analysis of MHCC-97H cells transfected as (A). Scale bar: 20  $\mu$ m. Statistical analysis of invasion cells are shown in the right panel. (D) Cell proliferation analysis of MHCC-97H cells transfected with indicated expression vectors. The expression of miR-3180, CD36 and SCD1 are demonstrated in the right panel. (E) Wound healing analysis of MHCC-97H cells transfected as in (D). Scale bar: 50  $\mu$ m. Statistical analysis of relative migrations are demonstrated shown in the right panel. (F) Transwell analysis of MHCC-97H cells transfected as in (D). Scale bar: 20  $\mu$ m. Statistical analysis of invasion cells are shown in the right panel. Data shown are presented as mean  $\pm$  SD of triplicate measurements with similar results. \*\*P < 0.01.

**Figure S3****A**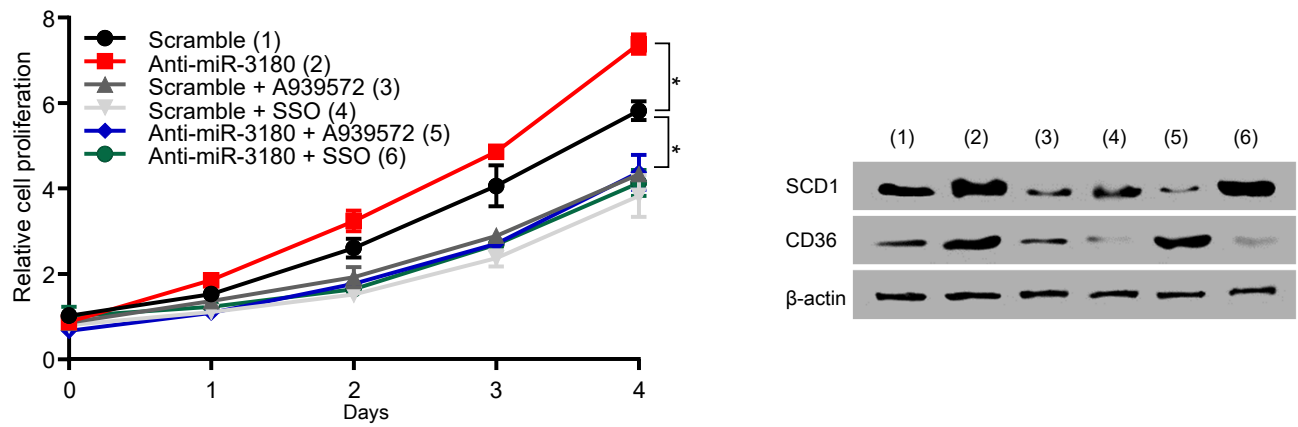**B**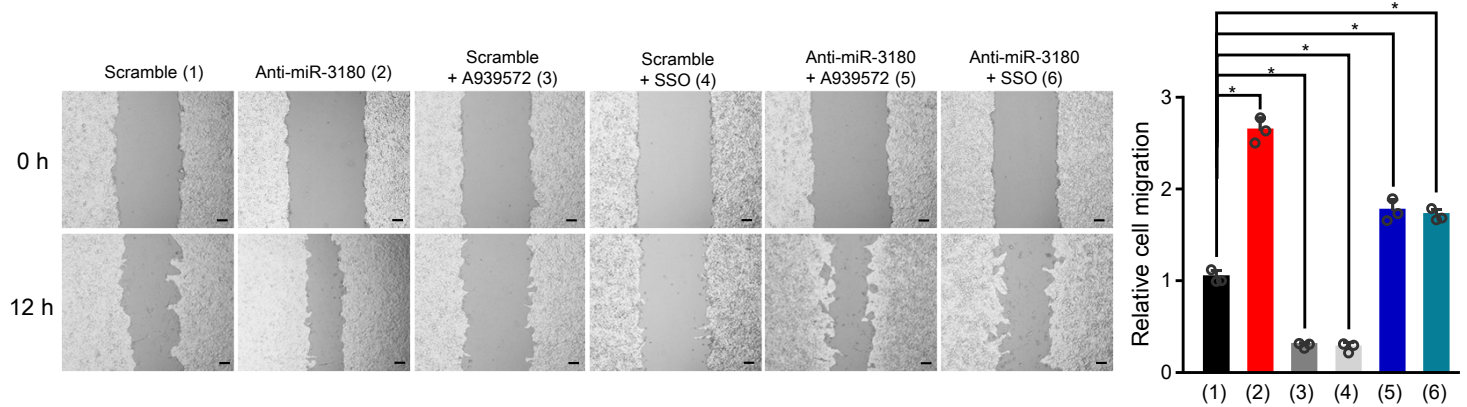**C**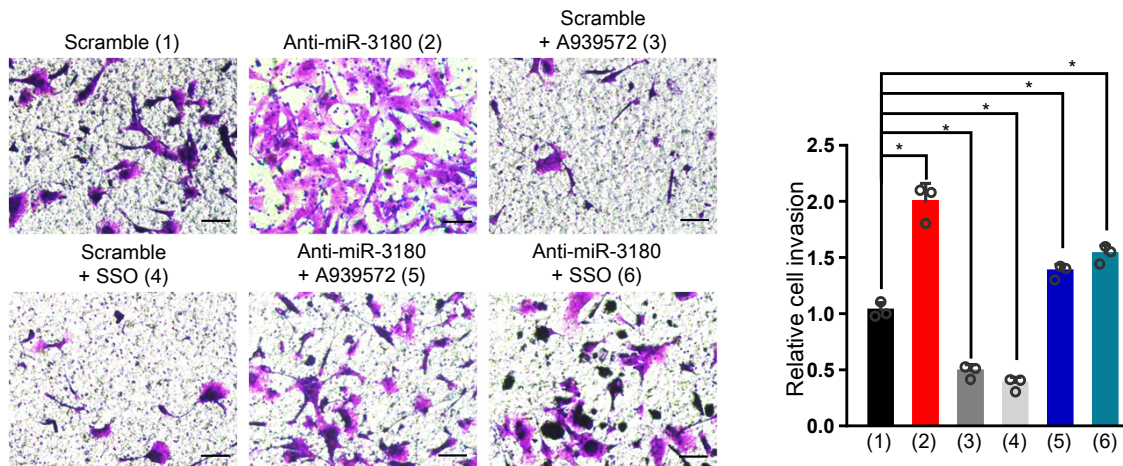

**Figure S3. MiR-3180 inhibits the proliferation, migration, and invasion of HCC cells by suppressing lipid synthesis and uptake. (A)** Cell proliferation analysis of MHCC-97H cells transfected with indicated expression vectors and treated with or without A939572 (15  $\mu$ m) or SSO (50  $\mu$ m). The expression of CD36 and SCD1 are shown in the right panel. **(B)** Wound healing analysis of MHCC-97H cells transfected and treated as (A). Scale bar: 50  $\mu$ m. Statistical analysis of relative migrations are shown in the right panel. **(C)** Transwell analysis of MHCC-97H cells transfected and treated as (A). Statistical analysis of relative invasion are shown in the right panel. Scale bar: 20  $\mu$ m. Data shown are presented as mean  $\pm$  SD of triplicate measurements with similar results. \*\*P < 0.01.

**Figure S4**

**A**

- Scramble + control shRNA (1)
- Anti-miR-3180 + control shRNA (2)
- Scramble + SCD1 shRNA (3)
- Scramble + CD36 shRNA (4)
- Anti-miR-3180 + SCD1 shRNA (5)
- Anti-miR-3180 + CD36 shRNA (6)

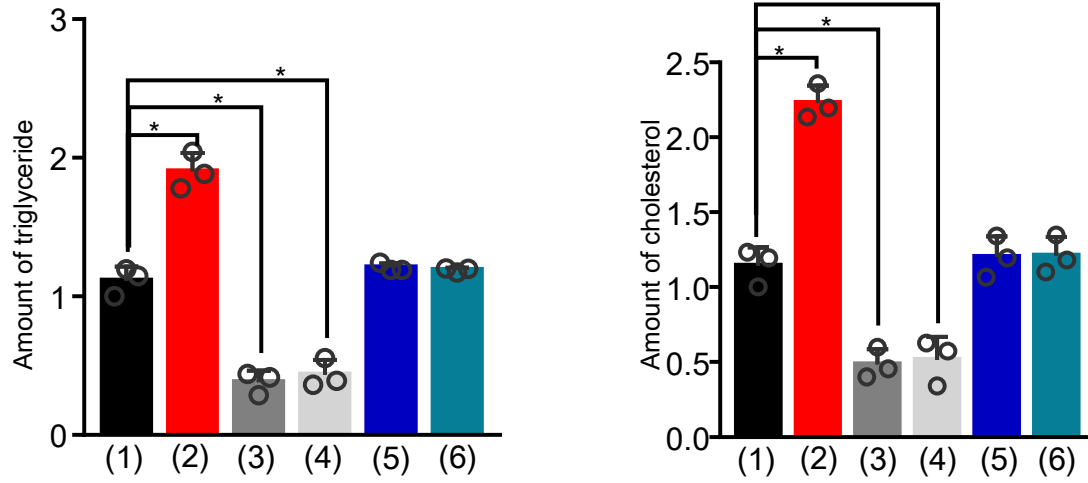

**Figure S4 The miR-3180 inhibits lipid synthesis *in vivo*.** Relative triglyceride and cholesterol contents in the indicated xenografts tumors from Figure 7A,B are shown.
